# Supplementary material for: An integrative approach identifies direct targets of the late viral transcription complex and an expanded promoter recognition motif in Kaposi’s sarcoma-associated herpesvirus
Source: PubMed Central journal article supplement (PMC6541308; doi:10.1371/journal.ppat.1007774), 2019-05-16
Supplement: ppat.1007774.s005.pdf [file ppat.1007774.s005.pdf]

**Supplementary Table 1:**  
List of all DNA sequences used in the study

| Name              | Sequence                                           | Used for    |
|-------------------|----------------------------------------------------|-------------|
| K8.1Pr_pGL4.16_F  | TGGCCTAACTGGCCGGTACCTGTGCCGTCGTCGGGA               | Cloning     |
| K8.1Pr_pGL4.16_R  | CCGGATTGCCAAGCTTAGGATTAAGGGATTAACCTCGGTCCC         | Cloning     |
| ORF57Pr_pGL4.16_F | TGGCCTAACTGGCCGGTACCAGTGTAAACAATAATGTTCCCACGGC     | Cloning     |
| ORF57Pr_pGL4.16_R | CCGGATTGCCAAGCTTTTTTGGGAACCTGGCAGCCAGGTTA          | Cloning     |
| Orilyt_KSHV_F     | GGTCTGACAGCGGCCGCCAGCTTATCCGGTGGCAATCT             | Cloning     |
| Orilyt_KSHV_R     | AGCACTGGTAACCACTGCAGTGGGCACAGAGATATGTGACGTGACGCCCT | Cloning     |
| K8.1_G8A_1        | GGCAGCAATATTTAAAGGACCGAAGTTAATC                    | Mutagenesis |
| K8.1_G8A_2        | GATTAACCTCGGTCCCTTTTAAATATTGCTGCC                  | Mutagenesis |
| K8.1_G8C_1        | GGCAGCAATATTTAAACGGACCGAAGTTAATC                   | Mutagenesis |
| K8.1_G8C_2        | GATTAACCTCGGTCCGTTTAAATATTGCTGCC                   | Mutagenesis |
| K8.1_G8T_1        | GGCAGCAATATTTAAATGGACCGAAGTTAATC                   | Mutagenesis |
| K8.1_G8T_2        | GATTAACCTCGGTCCATTTAAATATTGCTGCC                   | Mutagenesis |
| K8.1_G9C_1        | GCAGCAATATTTAAAGCGACCGAAGTTAATCC                   | Mutagenesis |
| K8.1_G9C_2        | GGATTAACCTCGGTCCGTTTAAATATTGCTGC                   | Mutagenesis |
| K8.1_G9A_1        | GCAGCAATATTTAAAGAGACCGAAGTTAATCC                   | Mutagenesis |
| K8.1_G9A_2        | GGATTAACCTCGGTCTCTTTAAATATTGCTGC                   | Mutagenesis |
| K8.1_G9T_1        | GCAGCAATATTTAAAGTGACCGAAGTTAATCC                   | Mutagenesis |
| K8.1_G9T_2        | GGATTAACCTCGGTCACTTTAAATATTGCTGC                   | Mutagenesis |
| K8.1_G10T_1       | CAGCAATATTTAAAGGTACCGAAGTTAATCCC                   | Mutagenesis |
| K8.1_G10T_2       | GGGATTAACCTCGGTACCTTTAAATATTGCTG                   | Mutagenesis |
| K8.1_A11C_1       | AGCAATATTTAAAGGGCCCGAAGTTAATCCCT                   | Mutagenesis |
| K8.1_A11C_2       | AGGGATTAACCTCGGGCCCTTTAAATATTGCT                   | Mutagenesis |
| K8.1_A11T_1       | AGCAATATTTAAAGGGTCCGAAGTTAATCCCT                   | Mutagenesis |
| K8.1_A11T_2       | AGGGATTAACCTCGGACCTTTAAATATTGCT                    | Mutagenesis |
| K8.1_A11G_1       | AGCAATATTTAAAGGGGCCGAAGTTAATCCCT                   | Mutagenesis |
| K8.1_A11G_2       | AGGGATTAACCTCGGCCCTTTAAATATTGCT                    | Mutagenesis |
| K8.1_C12G_1       | GCAATATTTAAAGGGAGCGAAGTTAATCCCTT                   | Mutagenesis |
| K8.1_C12G_2       | AAGGGATTAACCTCGCTCCCTTTAAATATTGC                   | Mutagenesis |
| K8.1_C12T_1       | GCAATATTTAAAGGGATCGAAGTTAATCCCTT                   | Mutagenesis |
| K8.1_C12T_2       | AAGGGATTAACCTCGATCCCTTTAAATATTGC                   | Mutagenesis |
| K8.1_GG89AC_1     | GGCAGCAATATTTAAACGACCGAAGTTAATCCCTT                | Mutagenesis |
| K8.1_GG89AC_2     | AAGGGATTAACCTCGGTCCGTTTAAATATTGCTGCC               | Mutagenesis |
| K8.1_GG89CT_1     | GGCAGCAATATTTAAACTGACCGAAGTTAATCCCTT               | Mutagenesis |
| K8.1_GG89CT_2     | AAGGGATTAACCTCGGTCCGTTTAAATATTGCTGCC               | Mutagenesis |
| K8.1_GG89TT_1     | GGCAGCAATATTTAAATTGACCGAAGTTAATCCCTT               | Mutagenesis |
| K8.1_GG89TT_2     | AAGGGATTAACCTCGGTCAATTTAAATATTGCTGCC               | Mutagenesis |

|                       |                                                 |                               |
|-----------------------|-------------------------------------------------|-------------------------------|
| K8.1_AC1112CG_1       | GGCAGCAATATTAAAGGGCGCGAAGTTAATCCCTTAATC         | Mutagenesis                   |
| K8.1_AC1112CG_2       | GATTAAGGGATTAACCTTCGCGCCCTTTAATATTGCTGCC        | Mutagenesis                   |
| K8.1_AC1112GT_1       | GGCAGCAATATTAAAGGGGTGGAAGTTAATCCCTTAATC         | Mutagenesis                   |
| K8.1_AC1112GT_2       | GATTAAGGGATTAACCTTCGACCCCTTTAATATTGCTGCC        | Mutagenesis                   |
| K8.1_TATT->TATA_1     | GTTATCCGGCAGCAATATAAAAGGGACCGAAGTTAATC          | Mutagenesis                   |
| K8.1_TATT->TATA_2     | GATTAACCTTCGGTCCCTTTTATATTGCTGCCGATAAC          | Mutagenesis                   |
| K8.1_GGGAC->TACGA_1   | GGCAGCAATATTAAATACGACGAAGTTAATCCCTT             | Mutagenesis                   |
| K8.1_GGGAC->TACGA_2   | AAGGGATTAACCTTCGTCTGATTTAATATTGCTGCC            | Mutagenesis                   |
| K8.1_GGGAC->ACTCG_1   | GGCAGCAATATTAAACTCGCGAAGTTAATCCCTT              | Mutagenesis                   |
| K8.1_GGGAC->ACTCG_2   | AAGGGATTAACCTTCGCGAGTTTAAATATTGCTGCC            | Mutagenesis                   |
| K8.1Pr_qPCR_F         | GGGAGAACCATGCCAGACTTTG                          | ChIP-qPCR                     |
| K8.1Pr_qPCR_R         | GCATAGGATTAGGAGCGCCAC                           | ChIP-qPCR                     |
| ORF59Pr_qPCR_F        | AATCCACAGGCATGATTGC                             | ChIP-qPCR/<br>DNA replication |
| ORF59Pr_qPCR_R        | CACACTTCCACCTCCCCTAA                            | ChIP-qPCR<br>DNA replication  |
| CPSF6Pr_qPCR_F        | CGAGGAATGTCCCTGTTTGT                            | DNA replication               |
| CPSF6Pr_qPCR_R        | ACTGGCTGTCTCCTCTCAGC                            | DNA replication               |
| K8.1CDS_qPCR_F        | CCGTCGGTGTGTAGGGATAAAG                          | RT-qPCR                       |
| K8.1CDS_qPCR_R        | GTCGTTGTAGTGGTGGCAGAAA                          | RT-qPCR                       |
| ORF57CDS_qPCR_F       | TTTGACGAATCGAGGGACGACG                          | RT-qPCR                       |
| ORF57CDS_qPCR_R       | GCAGTTGAGAACGACCTTGAGAT                         | RT-qPCR                       |
| ORF17.5Pr_qPCR_F      | GCTGGCCTTTAAATACGCCG                            | ChIP-qPCR                     |
| ORF17.5Pr_qPCR_R      | TTTCGTCTAGTCCCCTGGAGA                           | ChIP-qPCR                     |
| OriLyt_L_qPCR_F       | CGGCGGAGGTTGTCAATAGT                            | ChIP-qPCR                     |
| OriLyt_L_qPCR_R       | GGGTCCTGTTCTGGGATAGC                            | ChIP-qPCR                     |
| OriLyt_R_qPCR_F       | CCCTGGGCACGATAACCATA                            | ChIP-qPCR                     |
| OriLyt_R_qPCR_R       | AGGGGCGCAAAACAATTGTG                            | ChIP-qPCR                     |
| ORF64Pr_qPCR_F        | GCAGAAAGAACTTGAGCTCT                            | ChIP-qPCR                     |
| ORF64Pr_qPCR_R        | AGGCAGACCGGGAGTACGTT                            | ChIP-qPCR                     |
| ORF37Pr_qPCR_F        | GCTGGCGTTTCAGAAGCAGTG                           | ChIP-qPCR                     |
| ORF37Pr_qPCR_R        | CCATCCAGGGTGTCAACCA                             | ChIP-qPCR                     |
| K8.1Pr_DoubleMutant_1 | GTTATCCGGCAGCAATATAAAATACGACGAAGTTAATCCCTTAATCC | Mutagenesis                   |
| K8.1Pr_DoubleMutant_2 | GGATTAAGGGATTAACCTTCGTCTGATTTTATATTGCTGCCGATAAC | Mutagenesis                   |
